# Supplementary material for: Spatiotemporal Clustering of Mycobacterium tuberculosis Complex Genotypes in Florida: Genetic Diversity Segregated by Country of Birth
Source: PubMed Central journal article supplement (PMC4836742; doi:10.1371/journal.pone.0153575), 2016-04-19
Supplement: pone.0153575.s003.pdf [file pone.0153575.s003.pdf]

# Re: Permission to Publish ZIPBND\_2012 under CC BY 4.0 License

Sam Palmer <sam@geoplan.ufl.edu>

Thu 07-Jan-16 3:22 PM

To: Seraphin,Marie N <nseraphin@ufl.edu>;

You have our permission to use ZIPBND\_2012 under the Creative Commons Attribution License

On 1/7/2016 3:10 PM, Seraphin,Marie N wrote:

Hello,

I request permission for the open-access journal PLOS ONE to publish ZIPBND\_2012 under the Creative Commons Attribution License (CCAL) CC BY 4.0 (<http://creativecommons.org/licenses/by/4.0/>). Please be aware that this license allows unrestricted use and distribution, even commercially, by third parties. Please reply and provide explicit written permission to publish ZIPBND\_2012 under a CC BY license.

Thank you

Marie

Marie Nancy Seraphin, MPH  
PhD Student in Epidemiology  
College of Public Health and Health Professions  
College of Medicine  
University of Florida  
Email: [nseraphin@ufl.edu](mailto:nseraphin@ufl.edu)  
Phone: 352-215-9472

--

\*\*\*\*\*  
Sam Palmer                      GeoPlan Center  
GIS Specialist                  University of Florida  
(352)392-3246                  431 Architecture Bldg  
[sam@geoplan.ufl.edu](mailto:sam@geoplan.ufl.edu)          Gainesville, FL 32611  
\*\*\*\*\*
